# Supplementary material for: Physical Exercise Affects Adipose Tissue Profile and Prevents Arterial Thrombosis in BDNF Val66Met Mice
Source: MDPI journal article supplement (doi:10.3390/cells8080875), 2019-08-11
Supplement: s1 [file s1]

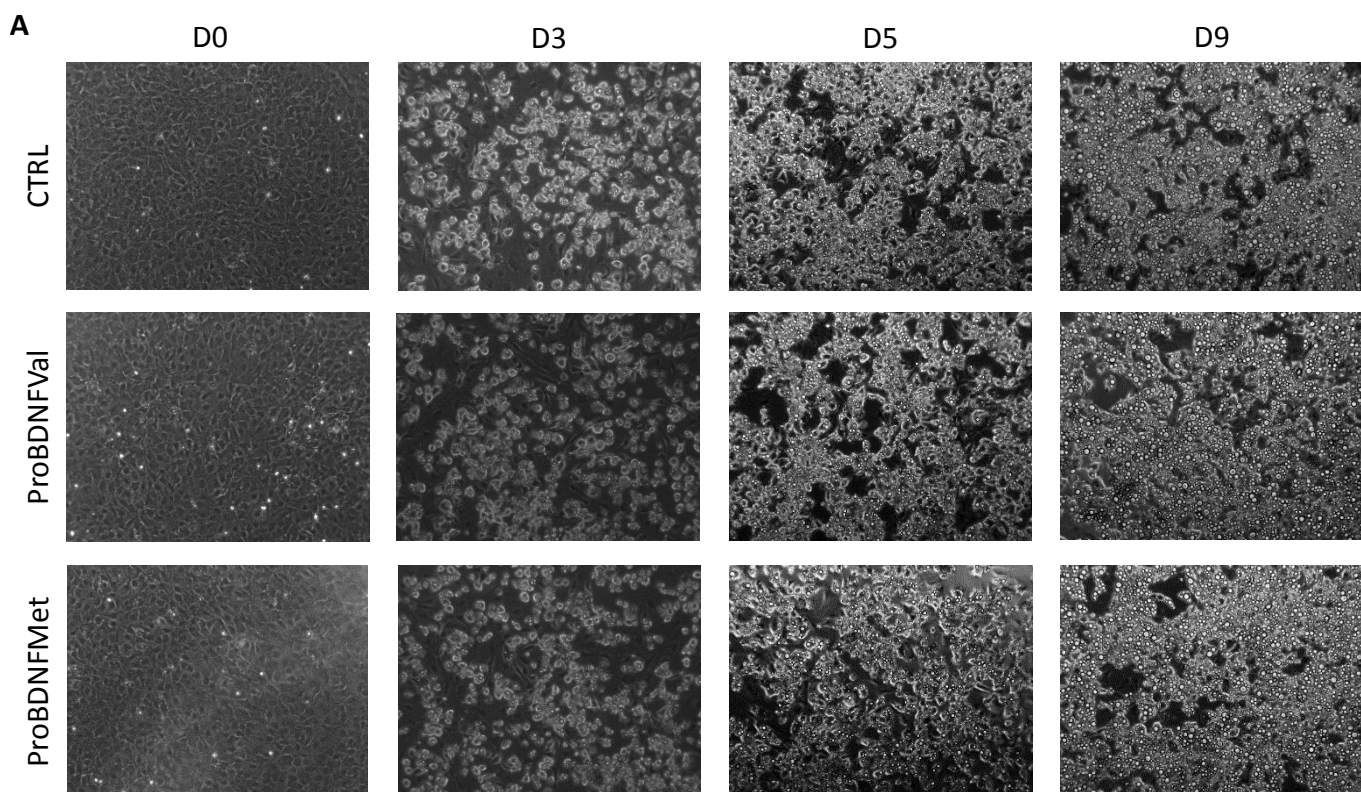

**B**

|           | CTRL         | ProBDNFVal   | ProBDNFMet   | P value |
|-----------|--------------|--------------|--------------|---------|
| <b>D0</b> | 298337±14913 | 300617±15581 | 290793±14213 | 0.7140  |
| <b>D3</b> | 293687±15349 | 291947±17485 | 293270±17323 | 0.9912  |
| <b>D5</b> | 291943±15906 | 288717±13068 | 292050±16976 | 0.9560  |
| <b>D9</b> | 291157±19035 | 293520±15363 | 292357±19944 | 0,9875  |

**Figure S1. Cell number and morphology are not altered by ProBDNFVal and ProBDNFMet treatment.**

(A) Contrast-phase microscope images non-treated (CTRL) and treated with ProBDNFVal or ProBDNFMet peptides C3H10T1/2 cells at different time points during adipogenesis. (B) Table reporting total number of cells/well retrieved from flow-cytometry analyses at different time points during C3H10T1/2 cell differentiation. n = 5 independent experiments/group. One-way ANOVA.
