# Supplementary material for: Physical Exercise Affects Adipose Tissue Profile and Prevents Arterial Thrombosis in BDNF Val66Met Mice
Source: MDPI journal article supplement (doi:10.3390/cells8080875), 2019-08-11
Supplement: s1 [file s1]

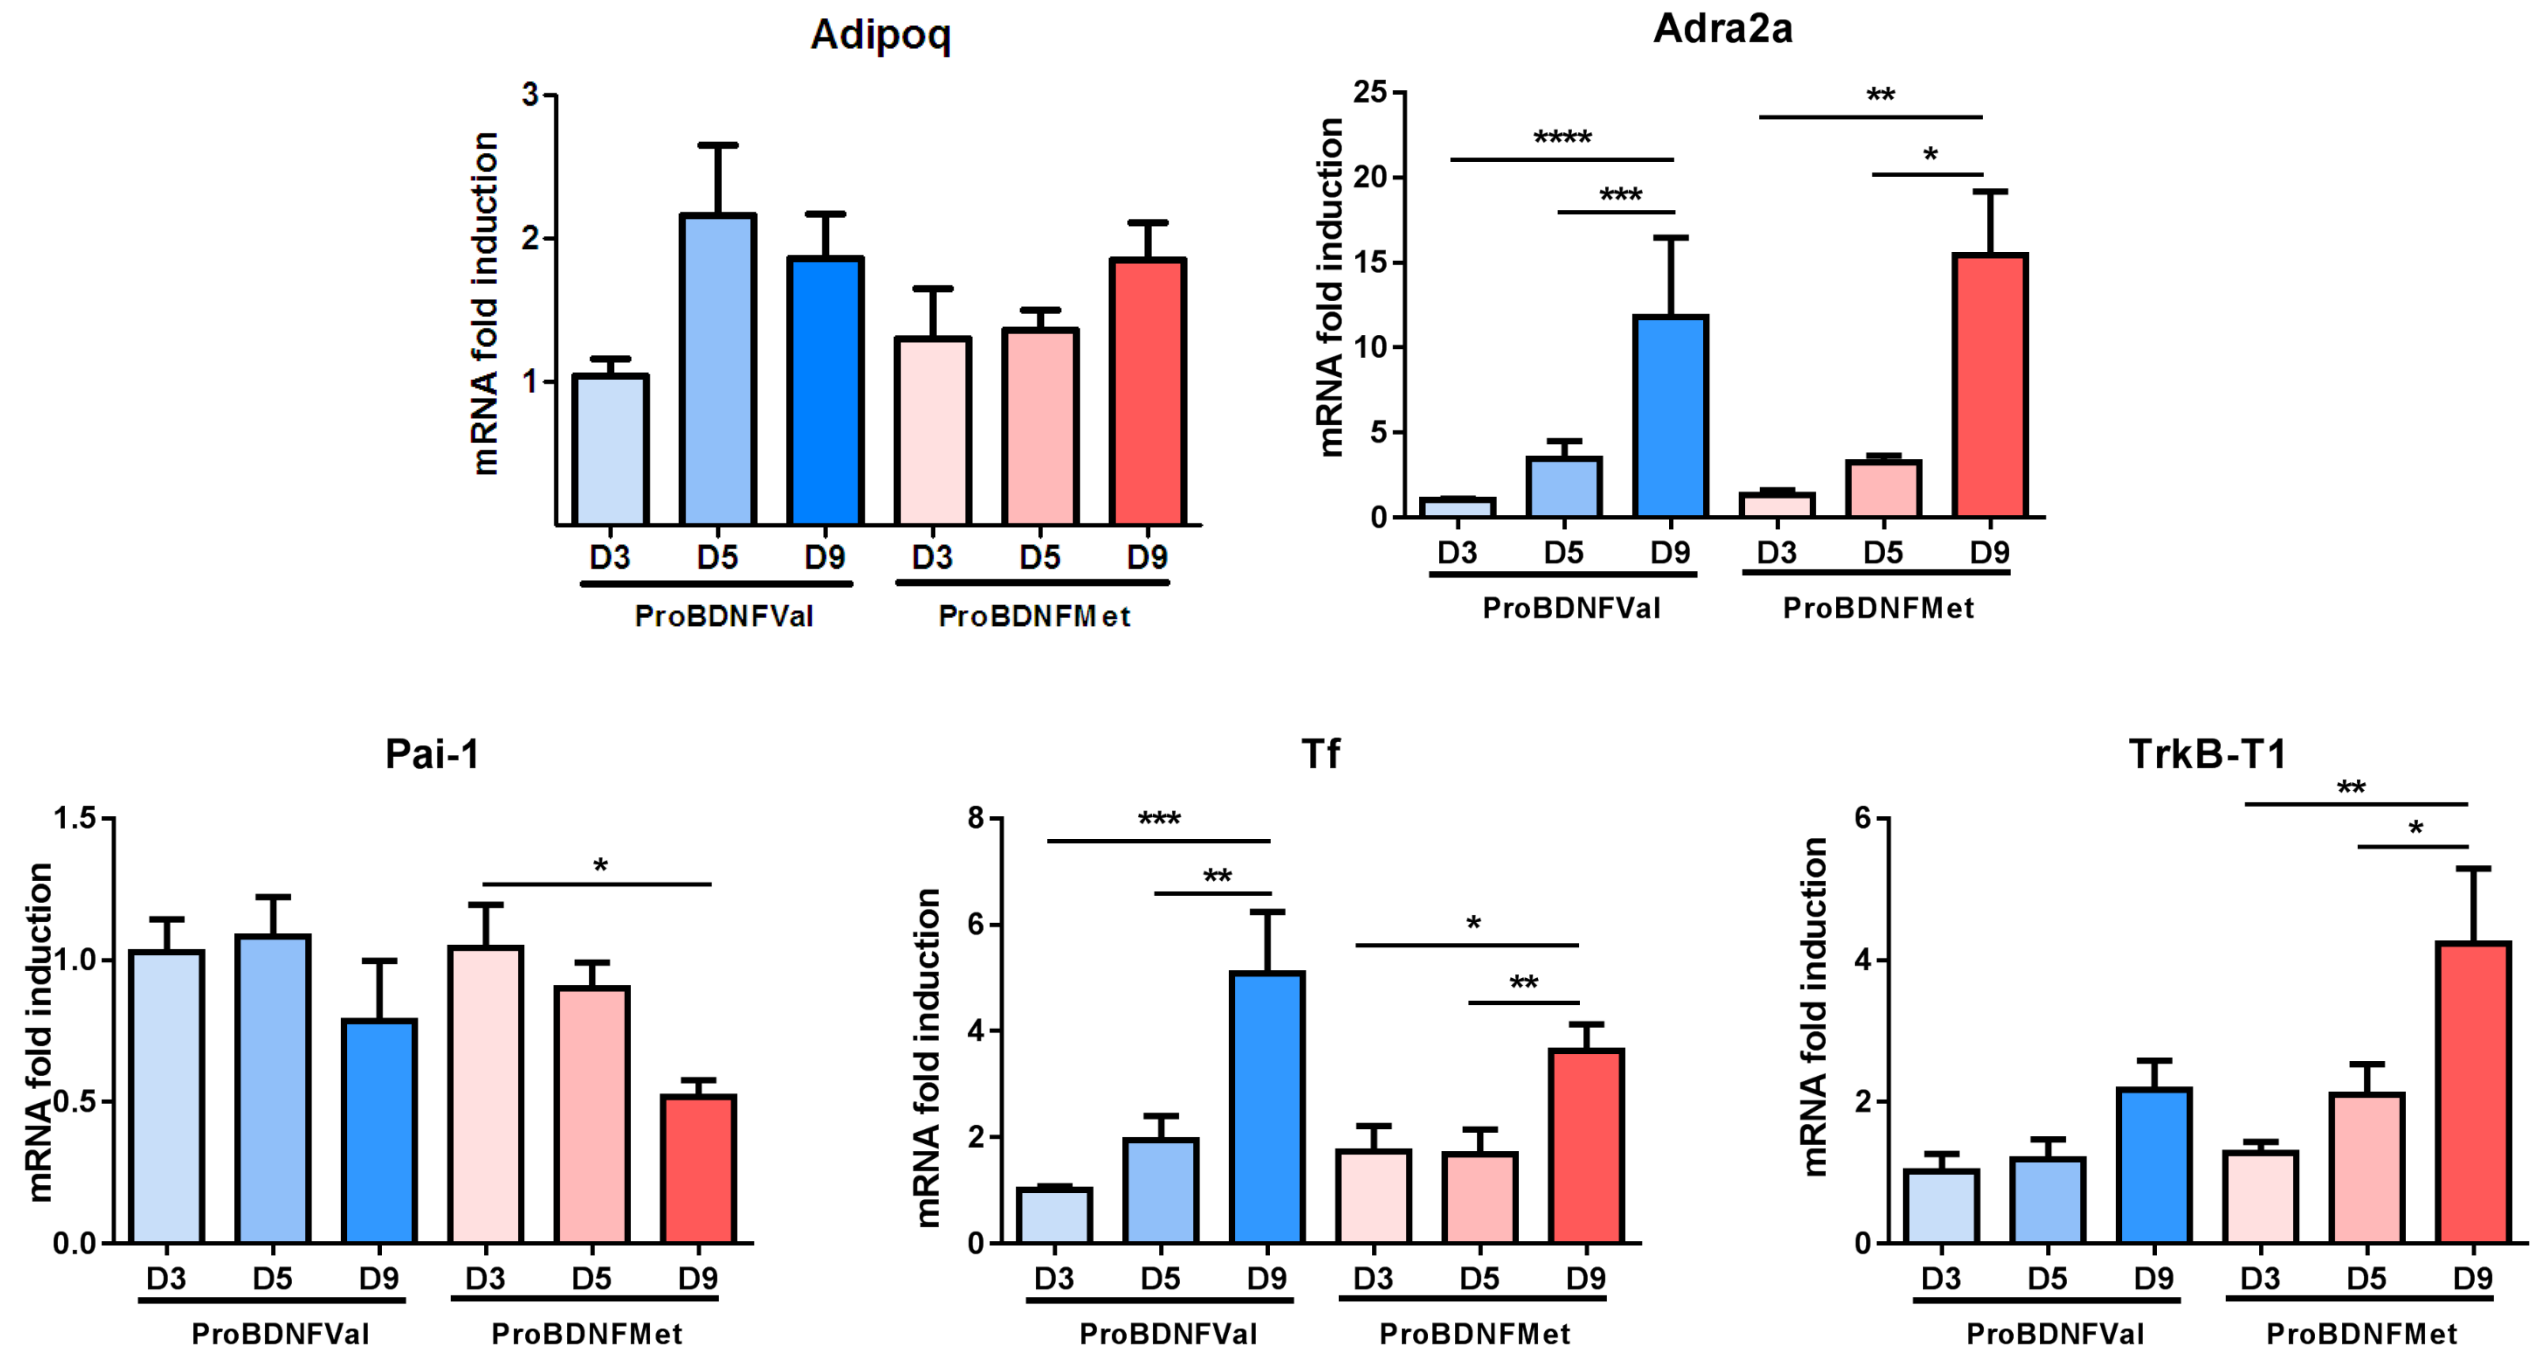

**Figure S3. Evaluation of the functional relevance of BDNF Val66Met protein on C3H10T1/2 cells adipogenic differentiation.** mRNA levels of previously analyzed genes. Data are expressed as mean  $\pm$  SEM. n = 5 independent experiments/group. Two-way ANOVA followed by Bonferroni post hoc analysis. \*  $p < 0.05$ , \*\*  $p < 0.01$ , \*\*\*  $p < 0.005$ , \*\*\*\*  $p < 0.001$ .
