# Supplementary material for: Physical Exercise Affects Adipose Tissue Profile and Prevents Arterial Thrombosis in BDNF Val66Met Mice
Source: MDPI journal article supplement (doi:10.3390/cells8080875), 2019-08-11
Supplement: s1 [file s1]

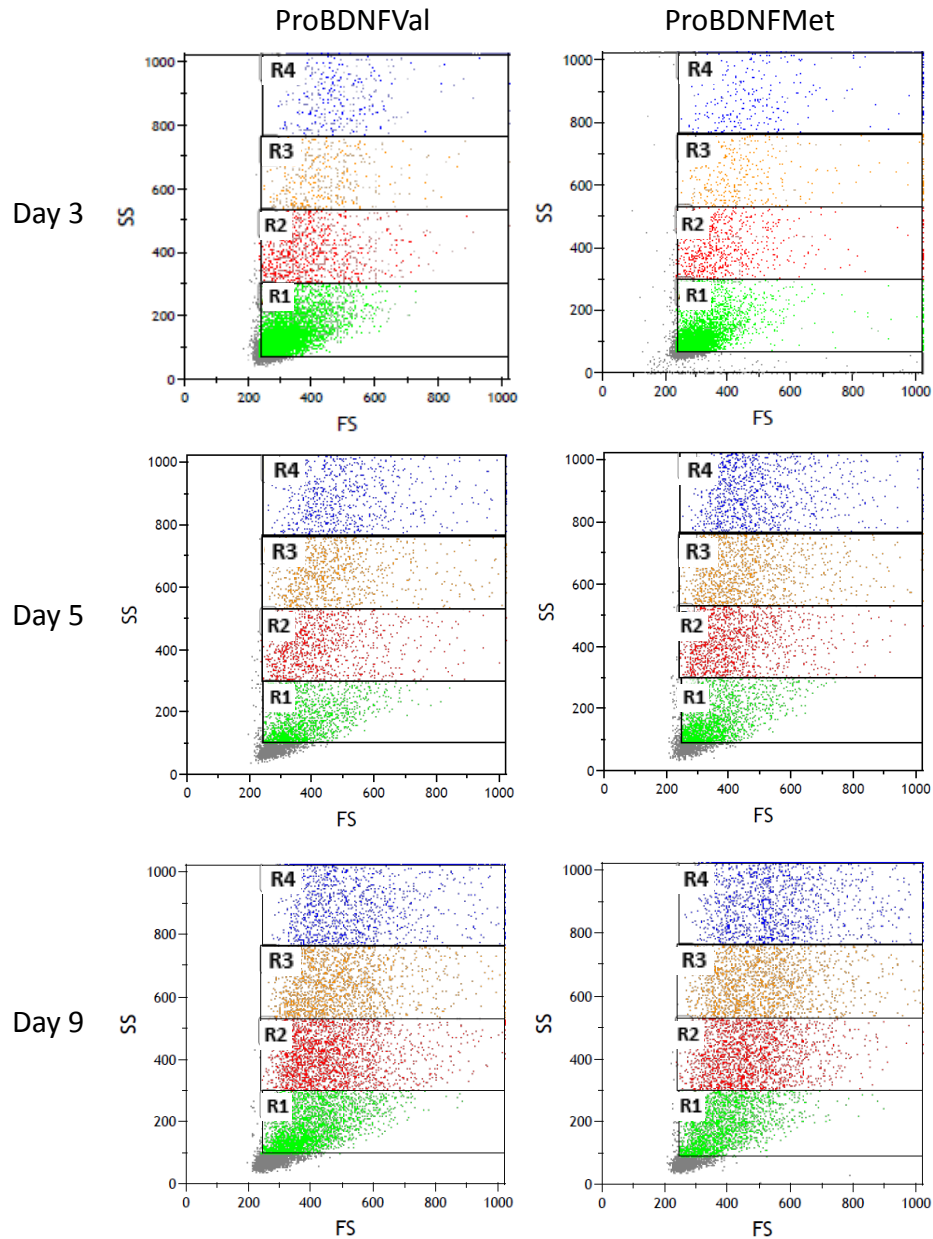

**Figure S2. Representative flow cytometry graphs showing gate selected for cell granulatory analyses at day 3, 5 and 9.** Non-induced cells were detected into the R1 gate, while cells with increasing granularity were identified in the regions from R2 to R4. n = 5 independent experiments/group.
