# Supplementary material for: Physical Exercise Affects Adipose Tissue Profile and Prevents Arterial Thrombosis in BDNF Val66Met Mice
Source: MDPI journal article supplement (doi:10.3390/cells8080875), 2019-08-11
Supplement: s1 [file s1]

**Table S2. F and P values referred to each graph analyzed by Two-way ANOVA or Three-way ANOVA.**  
The heading of each table refers to the Figure number in the text.

**Figure 4**

| % ingWAT mass/Body weight | F value      | P value  |
|---------------------------|--------------|----------|
| Interaction               | F= 0,9824    | P=0,3384 |
| Treatment                 | F= 0,0003243 | P=0,9859 |
| Genotype                  | F= 19,49     | P=0,0006 |
|                           |              |          |
| % epiWAT mass/Body Weight |              |          |
| Interaction               | F= 0,1144    | P=0,7402 |
| Treatment                 | F= 0,1526    | P=0,7020 |
| Genotype                  | F= 267       | P<0,0001 |

**Figure 5**

|             |          |          |
|-------------|----------|----------|
| Adipoq      | F value  | P value  |
| Interaction | F= 6,505 | P=0,0201 |
| Treatment   | F= 2,867 | P=0,1076 |
| Genotype    | F= 18,18 | P=0,0005 |
|             |          |          |
| Mcp-1       |          |          |
| Interaction | F= 10,06 | P=0,0056 |
| Treatment   | F= 7,033 | P=0,0168 |
| Genotype    | F= 5,112 | P=0,0372 |
|             |          |          |
|             |          |          |
| Il-6        |          |          |
| Interaction | F= 30,71 | P<0,0001 |
| Treatment   | F= 15,47 | P=0,0012 |
| Genotype    | F= 73,71 | P<0,0001 |
|             |          |          |
|             |          |          |
| Tnf-alpha   |          |          |
| Interaction | F= 6,05  | P=0,0257 |
| Treatment   | F= 15,98 | P=0,0010 |
| Genotype    | F= 127,7 | P<0,0001 |
|             |          |          |
|             |          |          |
| Tgf-beta    |          |          |
| Interaction | F= 12,65 | P=0,0026 |
| Treatment   | F= 6,892 | P=0,0184 |
| Genotype    | F= 6,411 | P=0,0222 |
|             |          |          |
|             |          |          |
| Pai-1       |          |          |
| Interaction | F= 12,83 | P=0,0020 |
| Treatment   | F= 7,189 | P=0,0148 |
| Genotype    | F= 5,342 | P=0,0322 |
|             |          |          |
|             |          |          |
| CD80        |          |          |
| Interaction | F= 27,77 | P<0,0001 |
| Treatment   | F= 24,06 | P<0,0001 |
| Genotype    | F= 66,53 | P<0,0001 |
|             |          |          |
|             |          |          |
| CD163       |          |          |
| Interaction | F= 15,92 | P=0,0007 |
| Treatment   | F= 12,17 | P=0,0023 |
| Genotype    | F= 21,14 | P=0,0002 |

|             |            |          |
|-------------|------------|----------|
|             |            |          |
|             |            |          |
| Bdnf        |            |          |
| Interaction | F= 14,78   | P=0,0011 |
| Treatment   | F= 0,07416 | P=0,7883 |
| Genotype    | F= 0,01268 | P=0,9115 |
|             |            |          |
| Sorl1       |            |          |
| Interaction | F = 6,777  | P=0,0208 |
| Treatment   | F= 37,77   | P<0,0001 |
| Genotype    | F= 13,21   | P=0,0027 |

**Figure 6**

|                                 |           |          |
|---------------------------------|-----------|----------|
| Platelets                       | F value   | P value  |
| Interaction                     | F= 0,3116 | P=0,5829 |
| Treatment                       | F= 18,15  | P=0,0004 |
| Genotype                        | F= 14,64  | P=0,0011 |
|                                 |           |          |
| Leukocytes                      |           |          |
| Interaction                     | F= 9,286  | P=0,0064 |
| Treatment                       | F= 45,86  | P<0,0001 |
| Genotype                        | F= 36,56  | P<0,0001 |
|                                 |           |          |
| % platelet/leukocyte aggregates |           |          |
| Interaction                     | F= 8,605  | P=0,0082 |
| Treatment                       | F= 24,01  | P<0,0001 |
| Genotype                        | F= 10,03  | P=0,0048 |
|                                 |           |          |
| Trombosi                        |           |          |
| Time                            | F= 10,89  | P<0,0001 |
| Treatment                       | F= 690    | P<0,0001 |
| Genotype                        | F= 551,1  | P<0,0001 |
| Time x Treatment                | F= 3,89   | P<0,0001 |
| Time x Genotype                 | F= 2,293  | P=0,0001 |
| Treatment x Genotype            | F= 302,7  | P<0,0001 |
| Treatment x Genotype x Time     | F= 1,574  | P=0,0277 |

**Figure S2**

| Pparg       | F value     | P value  |
|-------------|-------------|----------|
| Interaction | F= 0,09276  | P=0,7642 |
| Treatment   | F= 1,42     | P=0,2489 |
| Genotype    | F= 13,9     | P=0,0015 |
|             |             |          |
| C/ebp-alpha |             |          |
| Interaction | F= 0,1999   | P=0,6596 |
| Treatment   | F= 0,03827  | P=0,8469 |
| Genotype    | F= 36,77    | P<0,0001 |
|             |             |          |
| C/ebp-beta  |             |          |
| Interaction | F= 0,0166   | P=0,8988 |
| Treatment   | F= 0,4575   | P=0,5065 |
| Genotype    | F= 45,32    | P<0,0001 |
|             |             |          |
| Fabp4       |             |          |
| Interaction | F= 0,04116  | P=0,8414 |
| Treatment   | F= 0,02462  | P=0,8770 |
| Genotype    | F= 0,05556  | P=0,8162 |
|             |             |          |
| Tf          |             |          |
| Interaction | F= 1,788    | P=0,1962 |
| Treatment   | F= 1,735    | P=0,2027 |
| Genotype    | F= 6,051    | P=0,0231 |
|             |             |          |
| Adra2a      |             |          |
| Interaction | F= 0,3135   | P=0,5833 |
| Treatment   | F= 2,022    | P=0,1742 |
| Genotype    | F= 5,874    | P=0,0276 |
|             |             |          |
| Sirt1       |             |          |
| Interaction | F= 0,006876 | P=0,9347 |
| Treatment   | F= 0,2504   | P=0,6223 |
| Genotype    | F= 40,36    | P<0,0001 |
|             |             |          |
| TrkB-Full   |             |          |
| Interaction | F= 0,223    | P=0,6432 |
| Treatment   | F= 1,656    | P=0,2165 |
| Genotype    | F= 0,01476  | P=0,9048 |
|             |             |          |

|             |              |          |
|-------------|--------------|----------|
| TrkB-T1     |              |          |
| Interaction | F= 2,281     | P=0,1505 |
| Treatment   | F= 0,2184    | P=0,6465 |
| Genotype    | F= 0,0005985 | P=0,9808 |
