# Supplementary material for: Physical Exercise Affects Adipose Tissue Profile and Prevents Arterial Thrombosis in BDNF Val66Met Mice
Source: MDPI journal article supplement (doi:10.3390/cells8080875), 2019-08-11
Supplement: s1 [file s1]

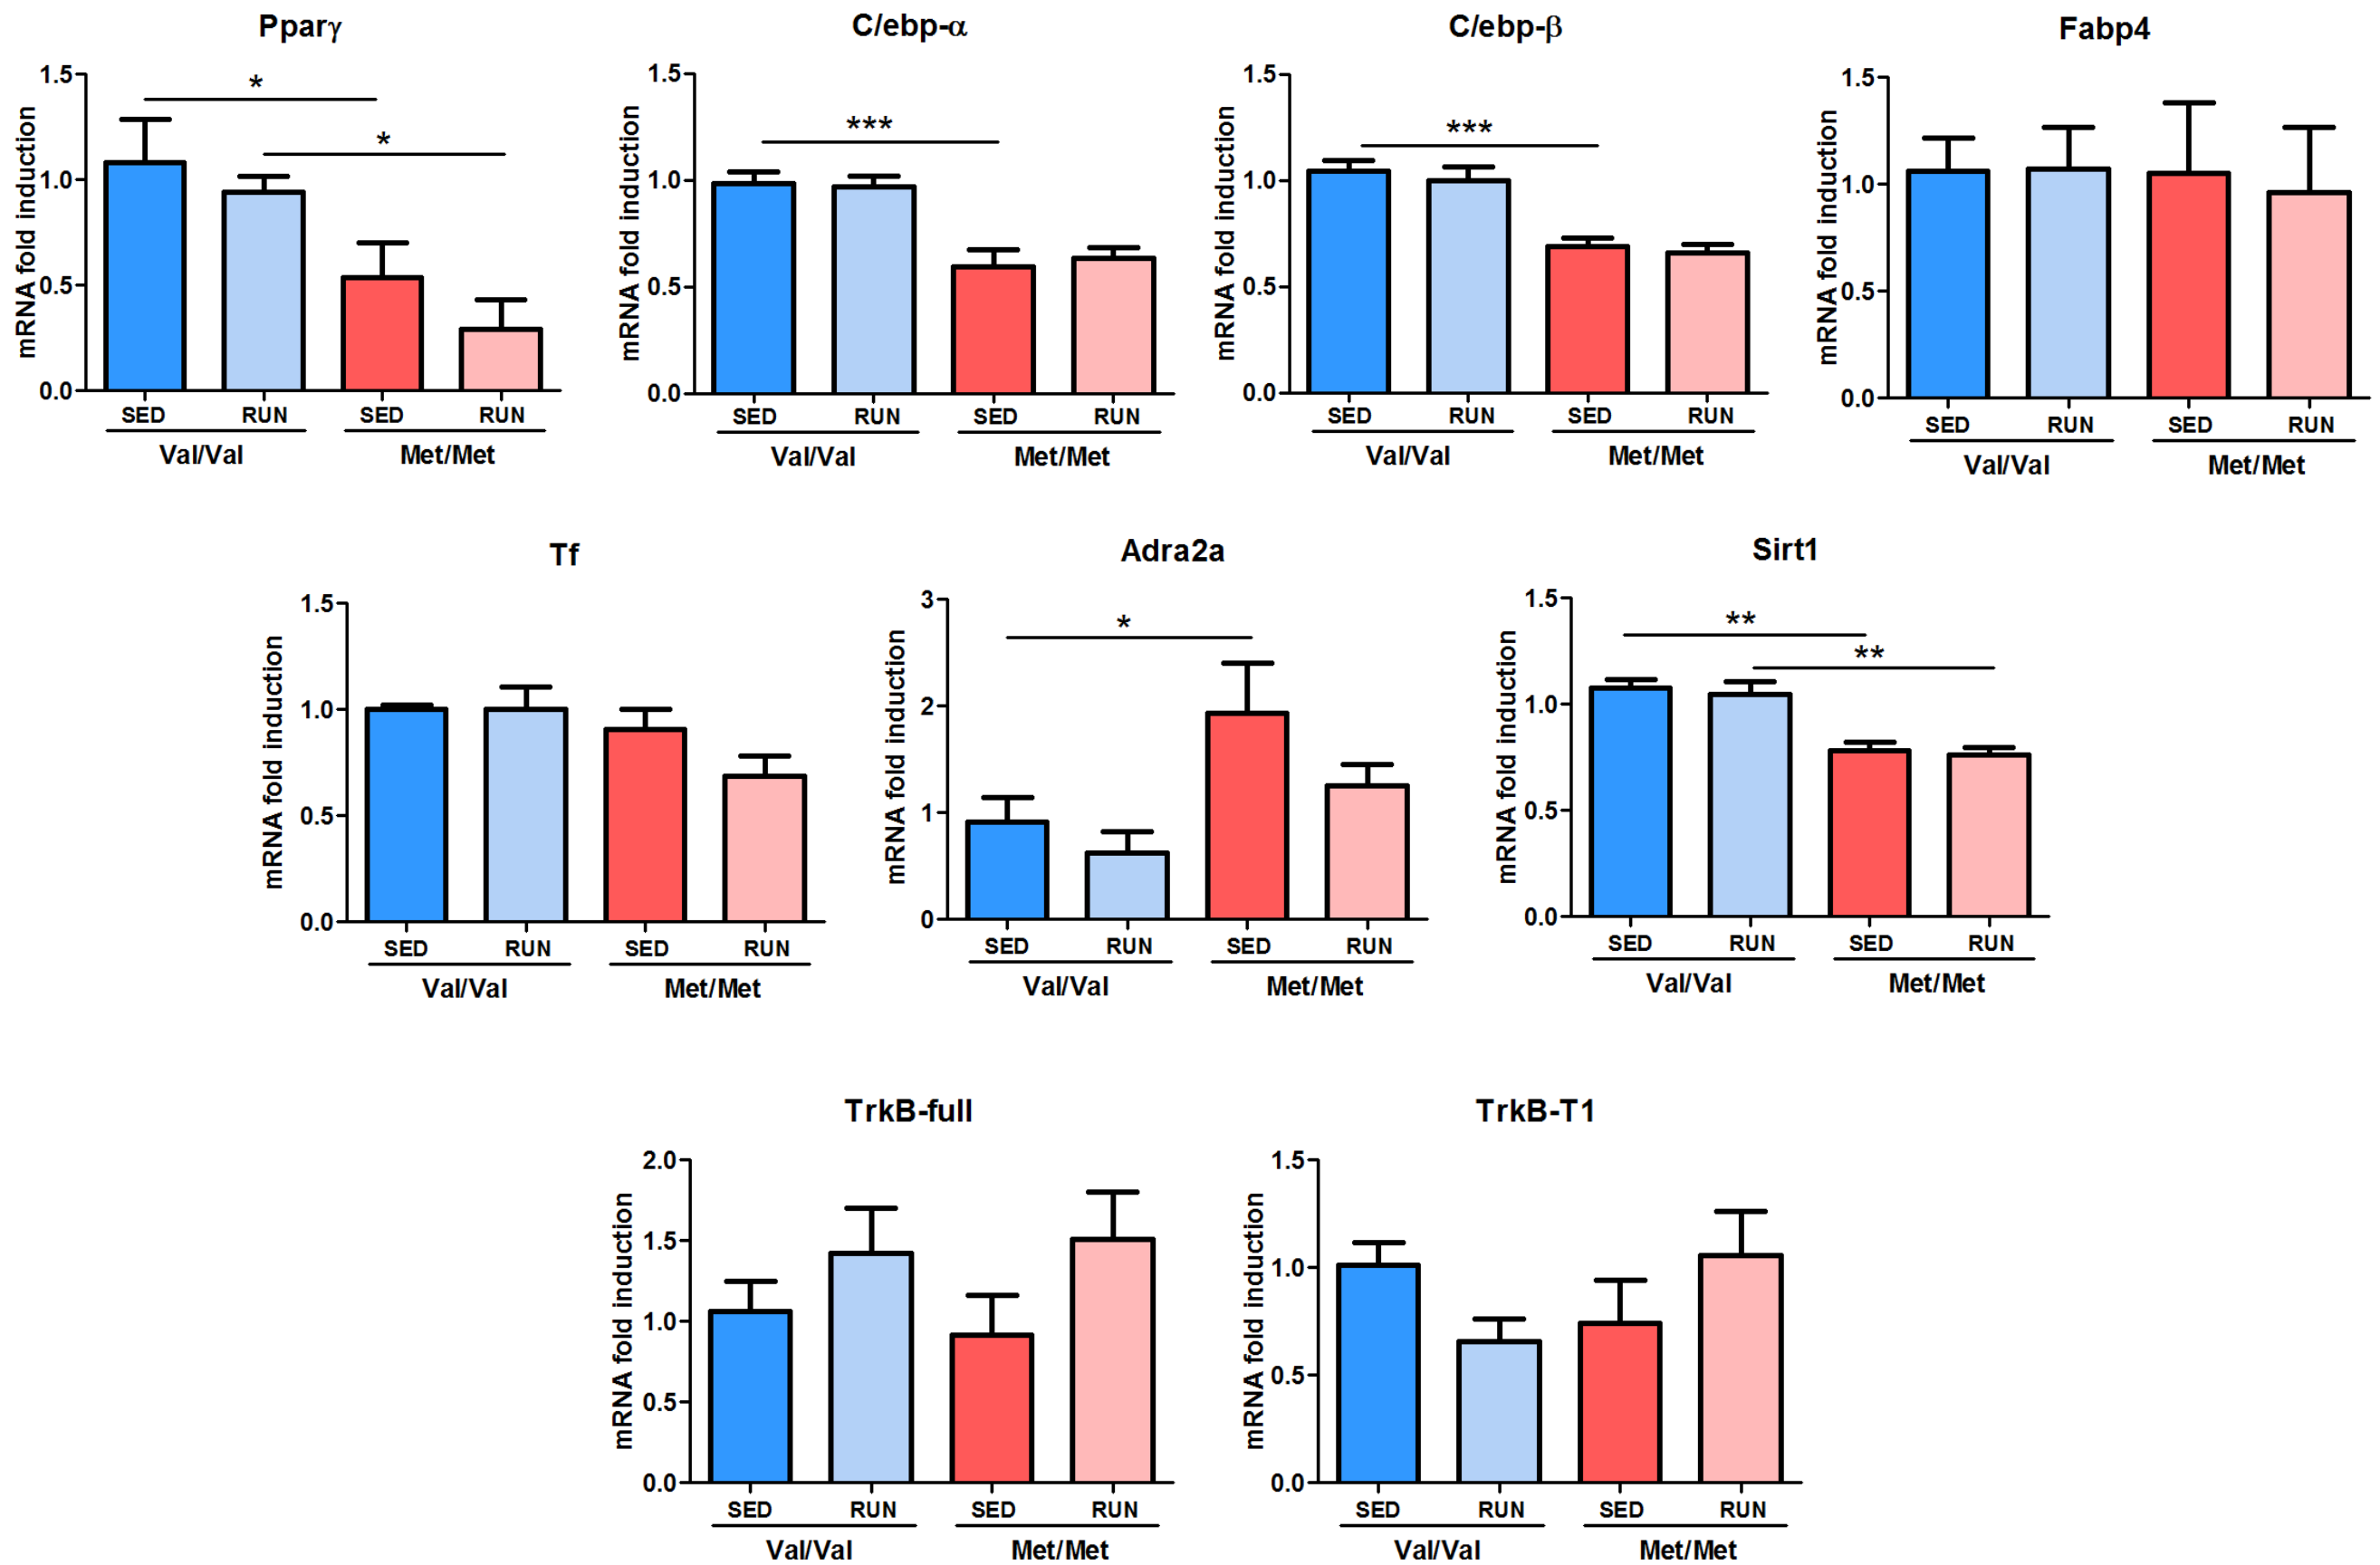

**Figure S4. Impact of free voluntary exercise on gene expression profile of adipose tissue.**

mRNA levels of previously analyzed genes in eWAT of sedentary and running BDNF<sup>Val/Val</sup> and BDNF<sup>Met/Met</sup> mice. Data are expressed as mean  $\pm$  SEM. n = 6 mice/group. Two-way ANOVA followed by Bonferroni post hoc analysis. \* p < 0.05, \*\* p < 0.01, \*\*\* p < 0.005.
