# Supplementary material for: Physical Exercise Affects Adipose Tissue Profile and Prevents Arterial Thrombosis in BDNF Val66Met Mice
Source: MDPI journal article supplement (doi:10.3390/cells8080875), 2019-08-11
Supplement: s1 [file s1]

**Table S1.** Primers sequences of the analyzed genes.

| Gene            | Sequence |                           |
|-----------------|----------|---------------------------|
| Gapdh           | fwd      | CGTGCCGCCTGGAGAAACC       |
|                 | rev      | TGGAAGAGTGGGAGTTGCTGTTG   |
| Ppar $\gamma$   | fwd      | GCCCTTTGGTGACTTTATGGA     |
|                 | rev      | GCAGCAGGTTGTCTTGGATG      |
| C/ebp- $\alpha$ | fwd      | AGAGCCGAGATAAAGCCAAAC     |
|                 | rev      | TCATTGTCACTGGTCAACTCC     |
| C/ebp- $\beta$  | fwd      | CCCCGCGTTCATGCA           |
|                 | rev      | CAGTCGGGCTCGTAGT          |
| Adipoq          | fwd      | AGGCATCCCAGGACATC         |
|                 | rev      | CCTGTCATTCCAACATCTCC      |
| Fabp4           | fwd      | GGCGTGGAATTCGATGAA        |
|                 | rev      | GCTTGTCACCATCTCGTT        |
| Adra2a          | fwd      | AAAACCTCTTCTGGTGTCC       |
|                 | rev      | CGCTTCAGGTTGTACTCGAT      |
| Il-6            | fwd      | AAGACAAAGCCAGAGTCCTTCAGAG |
|                 | rev      | GTCTTGGTCCTTAGCCACTCCTTC  |
| Mcp-1           | fwd      | CTTCTGGGCCTGCTGTTCA       |
|                 | rev      | CCAGCCTACTCATTGGGATCA     |
| Tnf- $\alpha$   | fwd      | TGCCTATGTCTCAGCCTCTTC     |
|                 | rev      | GAGGCCATTTGGGAATTCT       |
| Tgf- $\beta$    | fwd      | TACTATGCTAAAGAGGTCACCC    |
|                 | rev      | CTTCCCGAATGTCTGACGTATTG   |
| Pai-1           | fwd      | GTCTTTCCGACCAAGAGCAG      |
|                 | rev      | ATCACTTGGCCCATGAAGAG      |
| Tf              | fwd      | CCCAAACCCGTCATCAAGTC      |
|                 | rev      | CCAAGTACGTCTGCTTCACAT     |
| CD163           | fwd      | GGGTCATTCAAGGCACACTG      |
|                 | rev      | CTGGCTGTCCTGTCAAGGCT      |
| CD80            | fwd      | CTGGGAAAAACCCCAGAAG       |
|                 | rev      | TGACAACGATGACGACGACTG     |
| Sorl1           | fwd      | GTGTGAGGACGGCGAGGCAT      |
|                 | rev      | GGTGGACTGCTGCCTCTGGTCA    |
| Sirt1           | fwd      | AGCAGGTTGCAGGAATCCAA      |
|                 | rev      | CACGAACAGCTTCACAATCAACTT  |
| Bdnf            | fwd      | TCGTTCTTTTCGAGTTAGCC      |
|                 | rev      | TTGGTAAACGGCACAAAAC       |
| Trk Full        | fwd      | CTCAAGTTGGCGAGACATTCCAAG  |
|                 | rev      | GGGGGTTTTCAATAACAGGAATCT  |
| TrkB-T1         | fwd      | TGGTGATGTTGCTCCTGCTC      |
|                 | rev      | CCCATCCAGTGGGATCTTATGA    |
